# Supplementary material for: Overexpression of the GR Riborepressor LncRNA GAS5 Results in Poor Treatment Response and Early Relapse in Childhood B-ALL
Source: MDPI journal article supplement (doi:10.3390/cancers13236064), 2021-12-01
Supplement: s1 [file s1]

**Supplemental Table S2.** Logistic regression analysis for the discrimination of chALL from healthy controls bone marrow

| Covariant                    | <u>Univariate Analysis</u> |                     |                              | <u>Multivariate Analysis<sup>a</sup></u> |                     |                              |
|------------------------------|----------------------------|---------------------|------------------------------|------------------------------------------|---------------------|------------------------------|
|                              | OR <sup>b</sup>            | 95% CI <sup>c</sup> | <i>p</i> -value <sup>d</sup> | OR <sup>b</sup>                          | 95% CI <sup>c</sup> | <i>p</i> -value <sup>d</sup> |
| <b>log<sub>10</sub> GAS5</b> | 2.399                      | 1.253-4.594         | 0.008                        | 2.341                                    | 1.114-4.920         | 0.025                        |
| <b>Age</b>                   | 1.070                      | 0.983-1.166         | 0.119                        | 1.069                                    | 0.979-1.167         | 0.139                        |
| <b>Gender</b>                | 1.433                      | 0.733-2.803         | 0.293                        | 1.229                                    | 0.614-2.460         | 0.560                        |

<sup>a</sup> Multivariate logistic regression models adjusted for log<sub>10</sub> GAS5, patient's age and gender.

<sup>b</sup> Odds ratio

<sup>c</sup> Confidence interval of the estimated OR

<sup>d</sup> Test for trend
