# Supplementary material for: Overexpression of the GR Riborepressor LncRNA GAS5 Results in Poor Treatment Response and Early Relapse in Childhood B-ALL
Source: MDPI journal article supplement (doi:10.3390/cancers13236064), 2021-12-01
Supplement: s1 [file s1]

**Supplemental Table S1.** Descriptive statistics of GAS5 expression levels in chALL patients (diagnosis and Eol) and healthy cohort.

| Variables                    | Mean ± SE    | Range          | Percentiles |      |                |      |       |
|------------------------------|--------------|----------------|-------------|------|----------------|------|-------|
|                              |              |                | 10          | 25   | 50<br>(median) | 75   | 90    |
| ch-ALL (diagnosis) (n=157)   |              |                |             |      |                |      |       |
| GAS5                         | 26.10 ± 9.98 | 0.34 - 1180.43 | 1.47        | 1.90 | 3.25           | 7.27 | 28.69 |
| healthy controls (n=65)      |              |                |             |      |                |      |       |
| GAS5                         | 4.53 ± 0.64  | 0.02 - 27.62   | 1.04        | 1.66 | 2.38           | 5.64 | 12.94 |
| FC                           |              |                | 1.41        | 1.14 | 1.37           | 1.29 | 2.22  |
| ch-ALL (diagnosis) (n=125)   |              |                |             |      |                |      |       |
| GAS5                         | 26.10 ± 9.98 | 0.34 - 1180.43 | 1.47        | 1.90 | 3.25           | 7.27 | 28.69 |
| ch-ALL (Eol; day 33) (n=109) |              |                |             |      |                |      |       |
| GAS5                         | 4.63 ± 0.65  | 0.33 – 43.77   | 1.07        | 1.58 | 2.33           | 4.22 | 8.80  |
| FC                           |              |                | 1.37        | 1.20 | 1.39           | 1.73 | 3.26  |

SE: Standard Error

FC: fold change
