# Supplementary material for: Overexpression of the GR Riborepressor LncRNA GAS5 Results in Poor Treatment Response and Early Relapse in Childhood B-ALL
Source: MDPI journal article supplement (doi:10.3390/cancers13236064), 2021-12-01
Supplement: s1 [file s1]

**Supplemental Table S3.** Cox regression analysis for chALL patients' disease-free survival (DFS) and overall survival (OS) according to GAS5 levels.

|                             | <i>Univariate analysis</i>  |                     |                              |                                   |                                        |                       |                     |                              |                                   |                                        |
|-----------------------------|-----------------------------|---------------------|------------------------------|-----------------------------------|----------------------------------------|-----------------------|---------------------|------------------------------|-----------------------------------|----------------------------------------|
|                             | Disease-free survival (DFS) |                     |                              |                                   |                                        | Overall survival (OS) |                     |                              |                                   |                                        |
| Covariant                   | HR <sup>a</sup>             | 95% CI <sup>b</sup> | <i>p</i> -value <sup>c</sup> | Bootstrap BCa 95% CI <sup>d</sup> | Bootstrap <i>p</i> -value <sup>c</sup> | HR <sup>a</sup>       | 95% CI <sup>b</sup> | <i>p</i> -value <sup>c</sup> | Bootstrap BCa 95% CI <sup>d</sup> | Bootstrap <i>p</i> -value <sup>c</sup> |
| <b>GAS5 expression</b>      |                             |                     |                              |                                   |                                        |                       |                     |                              |                                   |                                        |
| GAS5-low                    | 1.00                        |                     |                              |                                   |                                        | 1.00                  |                     |                              |                                   |                                        |
| GAS5-high                   | 2.900                       | 1.088-7.733         | 0.033                        | 1.020-12.92                       | 0.027                                  | 3.156                 | 1.095-9.095         | 0.033                        | 1.198-12.99                       | 0.011                                  |
| <b>Prednisone Response</b>  |                             |                     |                              |                                   |                                        |                       |                     |                              |                                   |                                        |
| GPR (<1000 blasts)          | 1.00                        |                     |                              |                                   |                                        | 1.00                  |                     |                              |                                   |                                        |
| PPR (≥1000 blasts)          | 1.760                       | 0.405-7.658         | 0.451                        | 0.044-5.635                       | 0.441                                  | 1.979                 | 0.449-8.731         | 0.367                        | 0.044-6.315                       | 0.290                                  |
| <b>Bone marrow (day 15)</b> |                             |                     |                              |                                   |                                        |                       |                     |                              |                                   |                                        |
| M1 (<5% blasts)             | 1.00                        |                     |                              |                                   |                                        | 1.00                  |                     |                              |                                   |                                        |
| M2/M3 (≥5% blasts)          | 3.460                       | 1.339-8.941         | 0.010                        | 1.104-11.90                       | 0.003                                  | 3.101                 | 1.125-8.546         | 0.029                        | 0.717-9.469                       | 0.017                                  |
| <b>Bone marrow (day 33)</b> |                             |                     |                              |                                   |                                        |                       |                     |                              |                                   |                                        |
| M1 (<5% blasts)             | 1.00                        |                     |                              |                                   |                                        | 1.00                  |                     |                              |                                   |                                        |
| M2/M3 (≥5% blasts)          | 9.652                       | 2.781-33.50         | 0.000                        | 0.049-49.50                       | 0.001                                  | 2.348                 | 0.310-17.80         | 0.409                        | 0.046-12.28                       | 0.206                                  |
| <b>MRD (day 15)</b>         |                             |                     |                              |                                   |                                        |                       |                     |                              |                                   |                                        |
| <10%                        | 1.00                        |                     |                              |                                   |                                        | 1.00                  |                     |                              |                                   |                                        |
| ≥10%                        | 1.597                       | 0.362-7.039         | 0.536                        | 0.043-5.033                       | 0.541                                  | 0.907                 | 0.328-2.508         | 0.850                        | 0.204-1.768                       | 0.878                                  |
| <b>WBC count</b>            |                             |                     |                              |                                   |                                        |                       |                     |                              |                                   |                                        |
| <20000 cells/μl             | 1.00                        |                     |                              |                                   |                                        | 1.00                  |                     |                              |                                   |                                        |
| ≥20000 cells/μl             | 0.395                       | 0.114-1.364         | 0.142                        | 0.026-1.126                       | 0.088                                  | 0.281                 | 0.064-1.238         | 0.093                        | 0.025-0.802                       | 0.060                                  |
| <b>BFM risk group</b>       |                             |                     |                              |                                   |                                        |                       |                     |                              |                                   |                                        |
| Low/Interm. risk            | 1.00                        |                     |                              |                                   |                                        | 1.00                  |                     |                              |                                   |                                        |
| High risk                   | 3.781                       | 1.462-9.775         | 0.006                        | 1.328-10.06                       | 0.001                                  | 1.767                 | 0.569-5.488         | 0.325                        | 0.383-4.545                       | 0.288                                  |
| <b>Age</b>                  |                             |                     |                              |                                   |                                        |                       |                     |                              |                                   |                                        |
| 1-5 years                   | 1.00                        |                     |                              |                                   |                                        | 1.00                  |                     |                              |                                   |                                        |
| <1 or ≥6 years              | 2.726                       | 1.022-7.271         | 0.045                        | 1.071-9.535                       | 0.023                                  | 2.797                 | 0.970-8.065         | 0.057                        | 0.933-15.44                       | 0.029                                  |

|                             | <i>Multivariate analysis<sup>e</sup></i> |                     |                      |                                   |                                |                       |                     |                      |                                             |                                |
|-----------------------------|------------------------------------------|---------------------|----------------------|-----------------------------------|--------------------------------|-----------------------|---------------------|----------------------|---------------------------------------------|--------------------------------|
|                             | Disease-free survival (DFS)              |                     |                      |                                   |                                | Overall survival (OS) |                     |                      |                                             |                                |
| Covariant                   | HR <sup>a</sup>                          | 95% CI <sup>b</sup> | p-value <sup>c</sup> | Bootstrap BCa 95% CI <sup>d</sup> | Bootstrap p-value <sup>c</sup> | HR <sup>a</sup>       | 95% CI <sup>b</sup> | p-value <sup>c</sup> | Bootstrap BCa 95% CI <sup>d</sup>           | Bootstrap p-value <sup>c</sup> |
| <b>GAS5 expression</b>      |                                          |                     |                      |                                   |                                |                       |                     |                      |                                             |                                |
| GAS5-low                    | 1.00                                     |                     |                      |                                   |                                | 1.00                  |                     |                      |                                             |                                |
| GAS5-high                   | 3.945                                    | 1.159-13.43         | 0.028                | 0.930-993.3                       | 0.033                          | 4.223                 | 1.157-15.41         | 0.029                | 0.990-69.62                                 | 0.029                          |
| <b>Prednisone Response</b>  |                                          |                     |                      |                                   |                                |                       |                     |                      |                                             |                                |
| GPR (<1000 blasts)          | 1.00                                     |                     |                      |                                   |                                | 1.00                  |                     |                      |                                             |                                |
| PPR (≥1000 blasts)          | 1.391                                    | 0.179-10.80         | 0.752                | 7.52x10 <sup>-7</sup> -1052       | 0.551                          | 2.666                 | 0.220-32.30         | 0.441                | 2.03x10 <sup>-6</sup> -2708                 | 0.145                          |
| <b>Bone marrow (day 15)</b> |                                          |                     |                      |                                   |                                |                       |                     |                      |                                             |                                |
| M1 (<5% blasts)             | 1.00                                     |                     |                      |                                   |                                | 1.00                  |                     |                      |                                             |                                |
| M2/M3 (≥5% blasts)          | 1.030                                    | 0.163-6.519         | 0.975                | 0.002-21.20                       | 0.985                          | 3.292                 | 0.849-12.76         | 0.085                | 0.325-34.02                                 | 0.153                          |
| <b>Bone marrow (day 33)</b> |                                          |                     |                      |                                   |                                |                       |                     |                      |                                             |                                |
| M1 (<5% blasts)             | 1.00                                     |                     |                      |                                   |                                | 1.00                  |                     |                      |                                             |                                |
| M2/M3 (≥5% blasts)          | 2.560                                    | 0.394-16.65         | 0.325                | 0.257-9170                        | 0.117                          | 1.018                 | 0.062-16.82         | 0.990                | 2.29x10 <sup>-7</sup> -1.53x10 <sup>8</sup> | 0.784                          |
| <b>MRD (day 15)</b>         |                                          |                     |                      |                                   |                                |                       |                     |                      |                                             |                                |
| <10%                        | 1.00                                     |                     |                      |                                   |                                | 1.00                  |                     |                      |                                             |                                |
| ≥10%                        | 0.960                                    | 0.381-2.420         | 0.932                | 0.001-5.518                       | 0.600                          | 0.859                 | 0.256-2.890         | 0.807                | 0.001-88.76                                 | 0.334                          |
| <b>WBC count</b>            |                                          |                     |                      |                                   |                                |                       |                     |                      |                                             |                                |
| <20000 cells/μl             | 1.00                                     |                     |                      |                                   |                                | 1.00                  |                     |                      |                                             |                                |
| ≥20000 cells/μl             | 0.823                                    | 0.209-3.237         | 0.781                | 7.03x10 <sup>-5</sup> -4.191      | 0.759                          | 0.486                 | 0.106-2.243         | 0.356                | 4.85x10 <sup>-6</sup> -2.092                | 0.240                          |
| <b>BFM risk group</b>       |                                          |                     |                      |                                   |                                |                       |                     |                      |                                             |                                |
| Low/Interm. risk            | 1.00                                     |                     |                      |                                   |                                | 1.00                  |                     |                      |                                             |                                |
| High risk                   | 1.760                                    | 0.611-5.069         | 0.295                | 0.005-12.27                       | 0.421                          | 0.797                 | 0.244-2.599         | 0.706                | 0.002-1.872                                 | 0.368                          |
| <b>Age</b>                  |                                          |                     |                      |                                   |                                |                       |                     |                      |                                             |                                |
| 1-5 years                   | 1.00                                     |                     |                      |                                   |                                | 1.00                  |                     |                      |                                             |                                |
| <1 or ≥6 years              | 2.099                                    | 0.701-6.288         | 0.185                | 0.693-25.94                       | 0.252                          | 2.439                 | 0.769-7.741         | 0.130                | 0.831-22.22                                 | 0.103                          |

<sup>a</sup> Hazard Ratio

<sup>b</sup> 95% confidence interval of the estimated HR

<sup>c</sup> calculated by test for trend. Bootstrap p-value is based on 1000 bootstrap samples

<sup>d</sup> Bootstrap bias-corrected and accelerated 95% confidence interval of the estimated HR based on 1000 bootstrap samples

<sup>e</sup> Multivariate analysis adjusted for GAS5 expression, WBC count, prednisone response, bone marrow (days 15 & 33), MRD (day 15), risk group and age
